# Supplementary material for: Comparative genomics in cyprinids: common carp ESTs help the annotation of the zebrafish genome
Source: PubMed Central journal article supplement (PMC1764476; doi:10.1186/1471-2105-7-s5-s2), 2006-12-18

frequency of clusters (%)

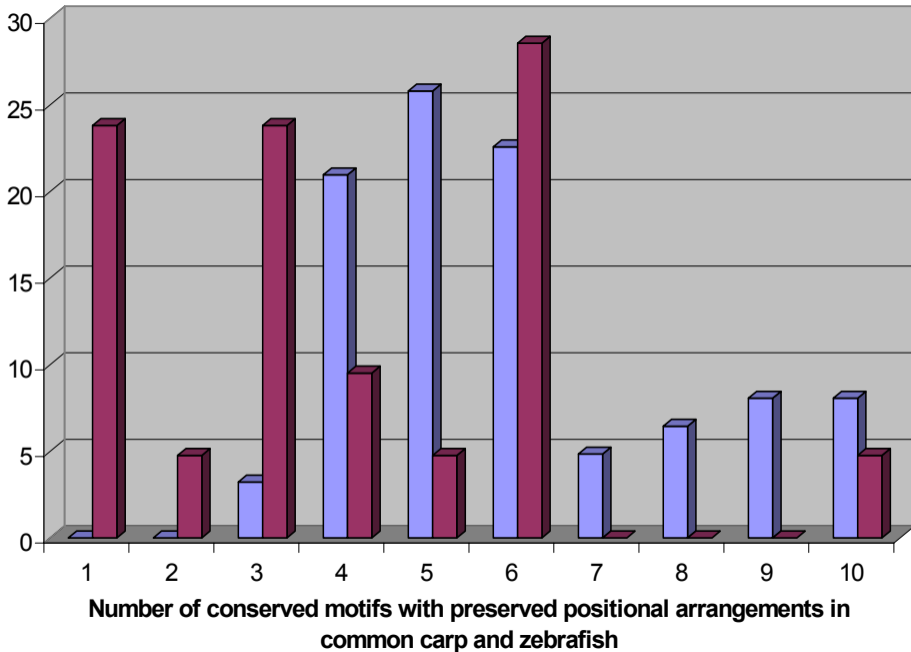

Supplement: 1471-2105-7-S5-S2-S9.pdf [file 1471-2105-7-S5-S2-S9.pdf]
